# Supplementary material
Source: MDPI journal article supplement (https://www.mdpi.com/2073-4433/12/8/1050)
Supplement: s1 [file s1]

## Supporting Information

# Influence of Krakow winter and summer dusts on the redox cycling of vitamin B<sub>12a</sub> in the presence of ascorbic acid

Justyna Polaczek<sup>1</sup>, Angelika Jodłowska<sup>1</sup> Grażyna Stochel<sup>1</sup> and Rudi van Eldik<sup>1,2,\*</sup>

<sup>1</sup> Faculty of Chemistry, Jagiellonian University, Gronostajowa 2, 30-387 Krakow, Poland; [justyna.polaczek@uj.edu.pl](mailto:justyna.polaczek@uj.edu.pl) (J.P.), [angelika.jodlowska@uj.edu.pl](mailto:angelika.jodlowska@uj.edu.pl) (A.J.), [stochel@chemia.uj.edu.pl](mailto:stochel@chemia.uj.edu.pl) (G.S.)

<sup>2</sup> Department of Chemistry and Pharmacy, University of Erlangen-Nuremberg, Egerlandstr. 1, 91058 Erlangen, Germany; [rudi.vaneldik@fau.de](mailto:rudi.vaneldik@fau.de) (R.v.E.)

\* Correspondence: [rudi.vaneldik@fau.de](mailto:rudi.vaneldik@fau.de)

**Table S1.** Elemental content of NIST PM, Krakow winter and Krakow summer dust obtained by ICP MS analysis. Presented values are average values from measurements of 6 samples using the method Total Quant.

| Element | Concentration µg/L |      |               |      |               |      |
|---------|--------------------|------|---------------|------|---------------|------|
|         | NIST               | +/-  | Krakow Winter | +/-  | Krakow Summer | +/-  |
| Li      | 0.30               | 0.09 | 0.21          | 0.07 | 0.19          | 0.07 |
| Na      | 83                 | 37   | 179           | 40   | 180           | 18   |
| Mg      | 86                 | 12   | 30            | 16   | 45            | 6    |
| Al      | 386                | 43   | 68            | 6    | 132           | 17   |
| K       | 190                | 91   | 148           | 81   | 100           | 98   |
| Ca      | 325                | 108  | 74            | 20   | 140           | 47   |
| Ti      | 16                 | 5    | 9             | 7    | 12            | 9    |
| V       | 1.4                | 0.2  | 0.17          | 0.03 | 0.36          | 0.06 |
| Cr      | 6.0                | 7.1  | 1.1           | 0.3  | 1.2           | 0.4  |
| Mn      | 11                 | 1    | 4.0           | 0.1  | 5.6           | 0.9  |
| Fe      | 348                | 83   | 95            | 16   | 176           | 52   |
| Co      | 0.18               | 0.02 | 0.07          | 0.04 | 0.06          | 0.02 |
| Ni      | 0.25               | 0.15 | 0.07          | 0.14 | 0.05          | 0.07 |
| Cu      | 2.5                | 0.9  | 0.3           | 0.5  | 1.1           | 0.8  |
| Zn      | 42                 | 6    | 44            | 10   | 73            | 17   |
| Ga      | 0.25               | 0.09 | 0.27          | 0.03 | 0.16          | 0.07 |
| Ge      | 0.26               | 0.14 | 0.2           | 0.1  | 0.14          | 0.03 |
| As      | 2.9                | 0.3  | 1.2           | 0.3  | 1.3           | 0.3  |
| Se      | 1.6                | 0.8  | 0.9           | 0.7  | 1.7           | 0.9  |
| Br      | 99                 | 4    | 109           | 6    | 124           | 11   |
| Rb      | 0.48               | 0.11 | 0.37          | 0.03 | 0.33          | 0.06 |
| Sr      | 2.1                | 0.4  | 0.70          | 0.18 | 0.71          | 0.21 |
| Y       | 0.13               | 0.03 | 0.02          | 0.01 | 0.04          | 0.01 |
| Zr      | 1.8                | 0.1  | 1.4           | 0.1  | 1.9           | 0.1  |
| Nb      | 0.22               | 0.11 | 0.02          | 0.01 | 0.04          | 0.01 |
| Mo      | 0.32               | 0.11 | 0.13          | 0.06 | 0.19          | 0.06 |
| Cd      | 0.79               | 0.13 | 0.21          | 0.04 | 0.22          | 0.04 |
| Sn      | 1.5                | 0.2  | 1.2           | 0.1  | 2.1           | 0.2  |
| Sb      | 0.46               | 0.09 | 0.86          | 0.08 | 1.0           | 0.2  |
| I       | 1.2                | 0.3  | 3.3           | 0.3  | 4.5           | 0.3  |
| Xe      | 1.0                | 1.2  | 0.0           | 0.0  | 0.0           | 0.0  |
| Ba      | 6.9                | 0.9  | 2.2           | 0.1  | 3.6           | 0.6  |
| La      | 0.46               | 0.09 | 0.11          | 0.09 | 0.13          | 0.02 |
| Ce      | 0.75               | 0.17 | 3.1           | 0.3  | 0.28          | 0.05 |
| Nd      | 0.22               | 0.03 | 0.01          | 0.01 | 0.04          | 0.01 |
| W       | 0.22               | 0.06 | 0.26          | 0.13 | 0.29          | 0.11 |
| Pb      | 63                 | 10   | 7.1           | 0.7  | 6.6           | 1.0  |
| Bi      | 0.12               | 0.03 | 0.21          | 0.02 | 0.13          | 0.01 |
